# Supplementary material for: A Preliminary Study Exploring the Relationship between Occupational Health Hazards and Gut Microbiota among Firefighters
Source: MDPI journal article supplement (doi:10.3390/life13091928), 2023-09-18

Supplementary Figure S1. Beta diversity: Non-metric Multidimensional Scaling (NMDS) plot for firefighter and control samples.

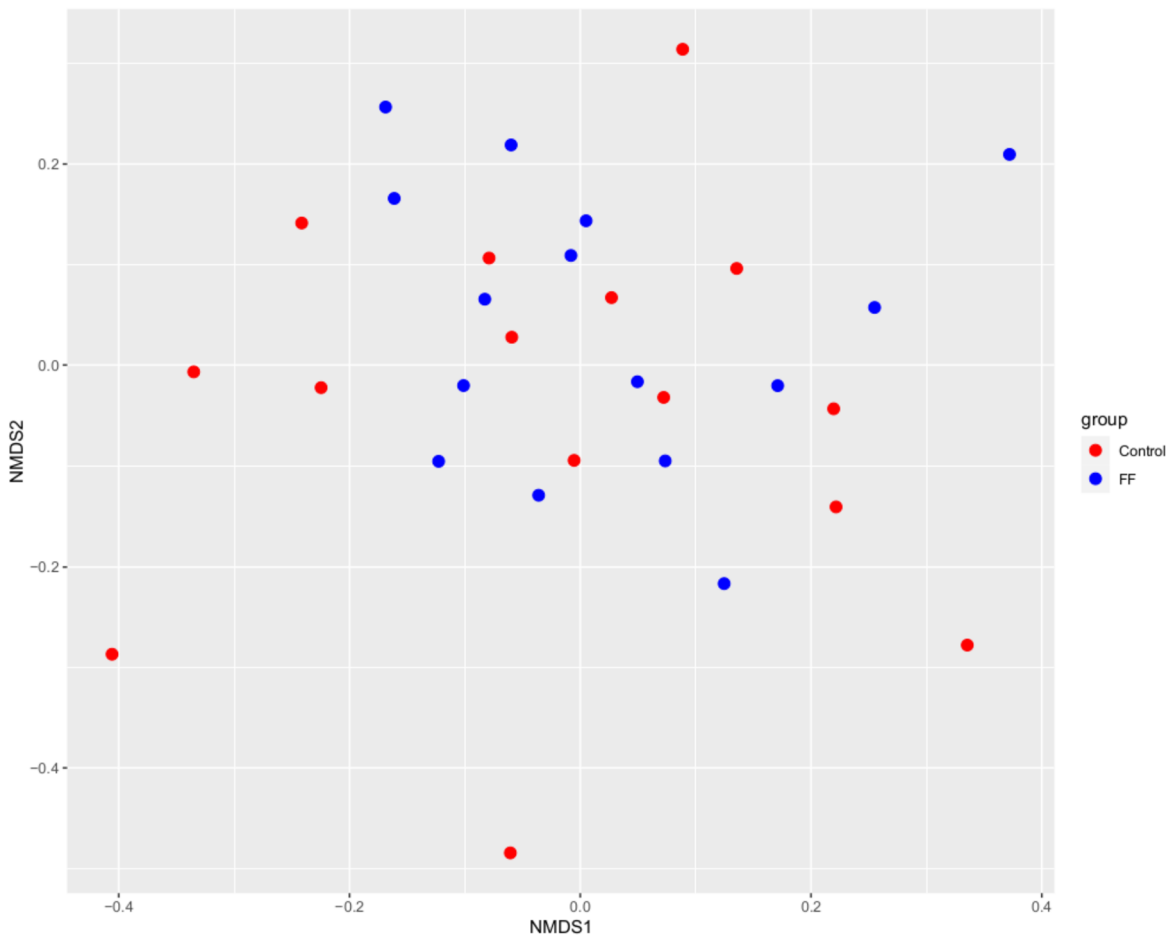

Supplementary Figure S2. Relative abundances at the phyla level

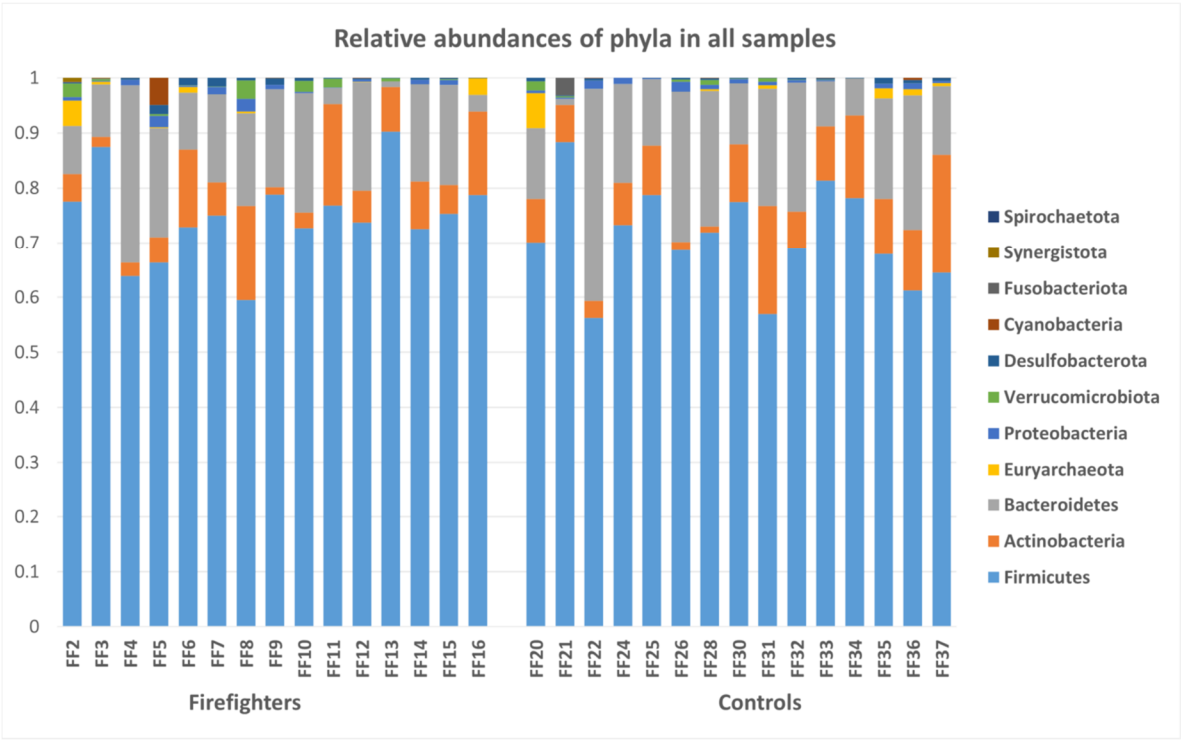

Supplementary Figure S3. Relative abundances of the top 15 genera

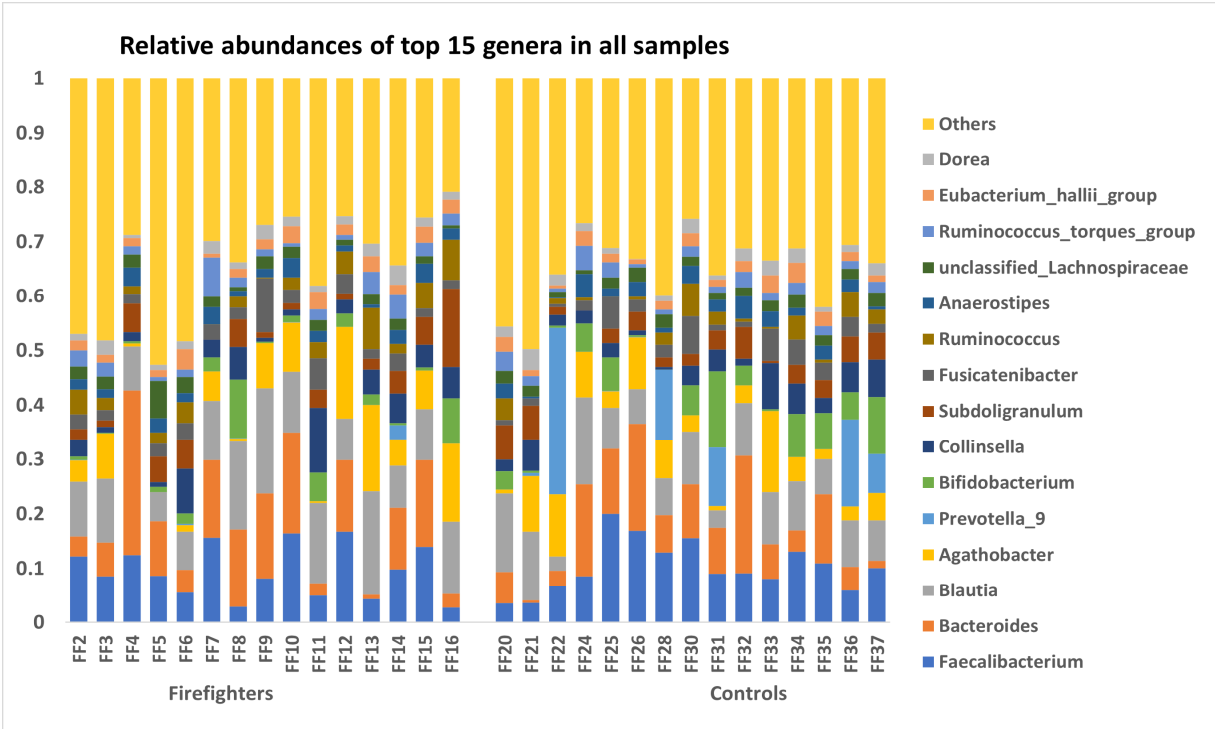

Supplement: s1 [file s1]
